# Supplementary material for: Using automated electronic medical record data extraction to model ALS survival and progression
Source: PubMed Central journal article supplement (PMC6295028; doi:10.1186/s12883-018-1208-z), 2018-12-14
Supplement: 12883_2018_1208_MOESM1_ESM.pdf [file 12883_2018_1208_MOESM1_ESM.pdf]

# Linearity of 16 randomly selected patients who had > 3 visits

ALSFRS-R Score

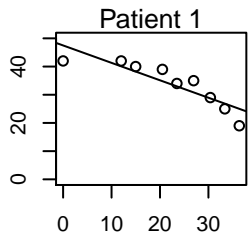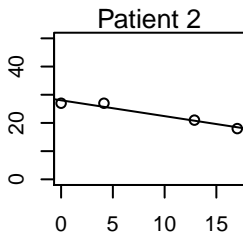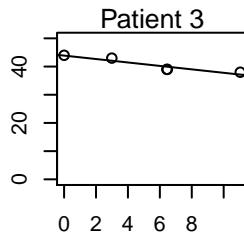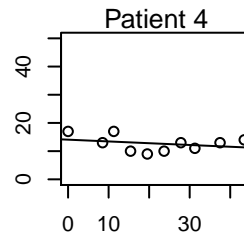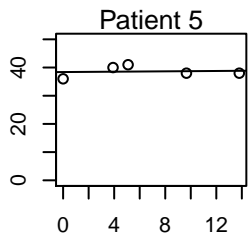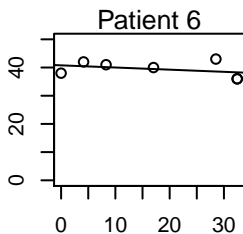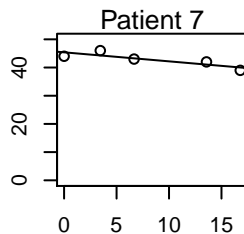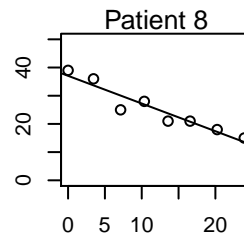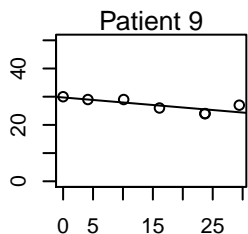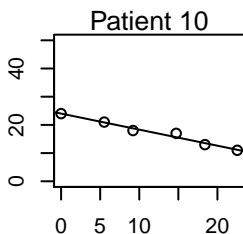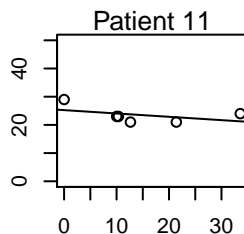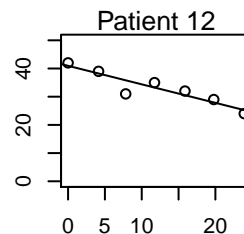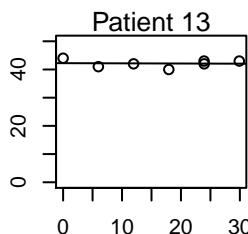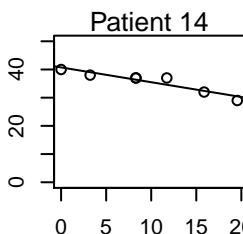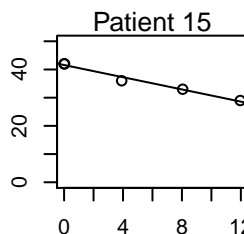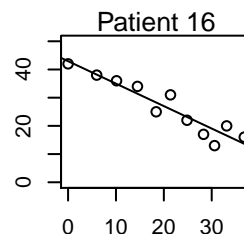

Time (months)
